# Supplementary material for: Cardiomyocyte-Targeting Peptide to Deliver Amiodarone
Source: MDPI journal article supplement (doi:10.3390/pharmaceutics15082107), 2023-08-09
Supplement: s1 [file s1]

# **Cardiomyocyte-Targeting Peptide to Deliver Amiodarone**

Maliha Zahid <sup>1,\*</sup>, Beth Weber <sup>2</sup>, Ray Yurko <sup>3</sup>, Kazi Islam <sup>3</sup>, Vaishavi Agrawal <sup>4</sup>, Jack Lopuszynski <sup>1</sup>, Hisato Yagi <sup>5</sup> and Guy Salama <sup>2</sup>

## **Supplemental Materials**

### Amio Injected Guinea Pigs

GP483  
Sinus Rhythm (135bpm)  
**Voltage**

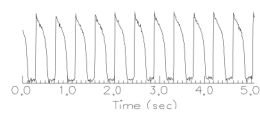

**Calcium**

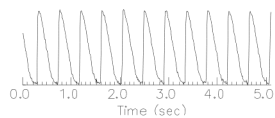

GP462  
Sinus Rhythm (105bpm)  
**Voltage**

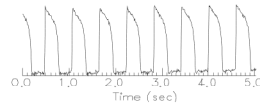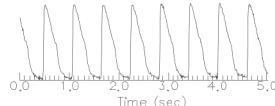

GP461  
Sinus Rhythm (105bpm)  
**Voltage**

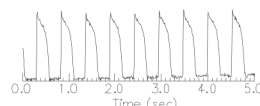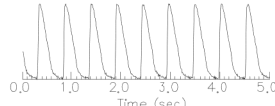

GP438  
Sinus Rhythm (165bpm)  
**Voltage**

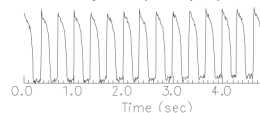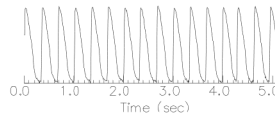

### CTP Injected Guinea Pigs

GP434  
Sinus Rhythm (240bpm)  
**Voltage**

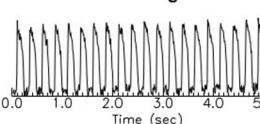

**Calcium**

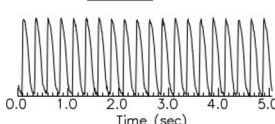

GP435  
Sinus Rhythm (240bpm)  
**Voltage**

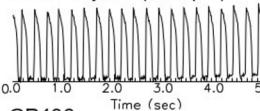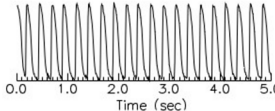

GP436  
Sinus Rhythm (240bpm)  
**Voltage**

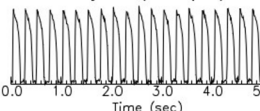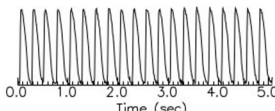

GP437  
Sinus Rhythm (240bpm)  
**Voltage**

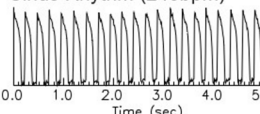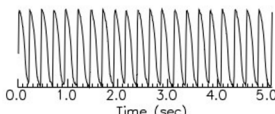

### Control Guinea Pigs

GP579  
Sinus Rhythm (195bpm)  
**Voltage**

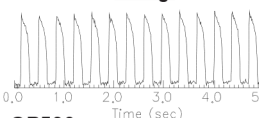

**Calcium**

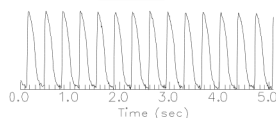

GP580  
Sinus Rhythm (210bpm)  
**Voltage**

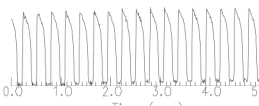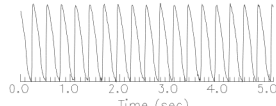

GP583  
Sinus Rhythm (240bpm)  
**Voltage**

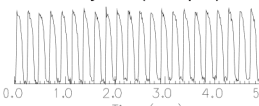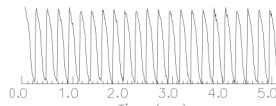

GP578  
Sinus Rhythm (210bpm)  
**Voltage**

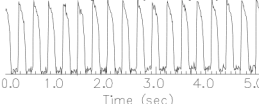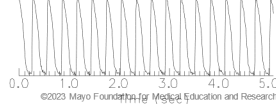

### CTP-Amio Injected Guinea Pigs

GP225  
Sinus Rhythm (270bpm)  
**Voltage**

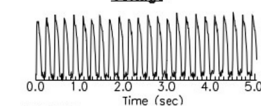

**Calcium**

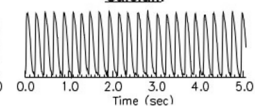

GP570  
Sinus Rhythm (240bpm)  
**Voltage**

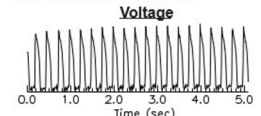

**Calcium**

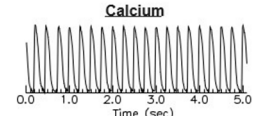

GP571  
Sinus Rhythm (240bpm)  
**Voltage**

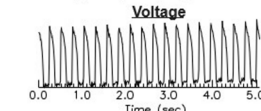

**Calcium**

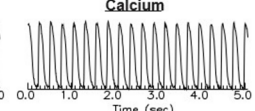

GP226  
Sinus Rhythm (210bpm)  
**Voltage**

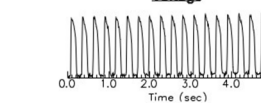

**Calcium**

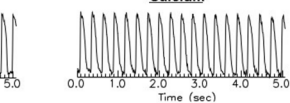

**Supplemental Figure S1:** Calcium and voltage measurements in each guinea pig injected with amiodarone, control (no injections), CTP, or CTP–amiodarone conjugate.

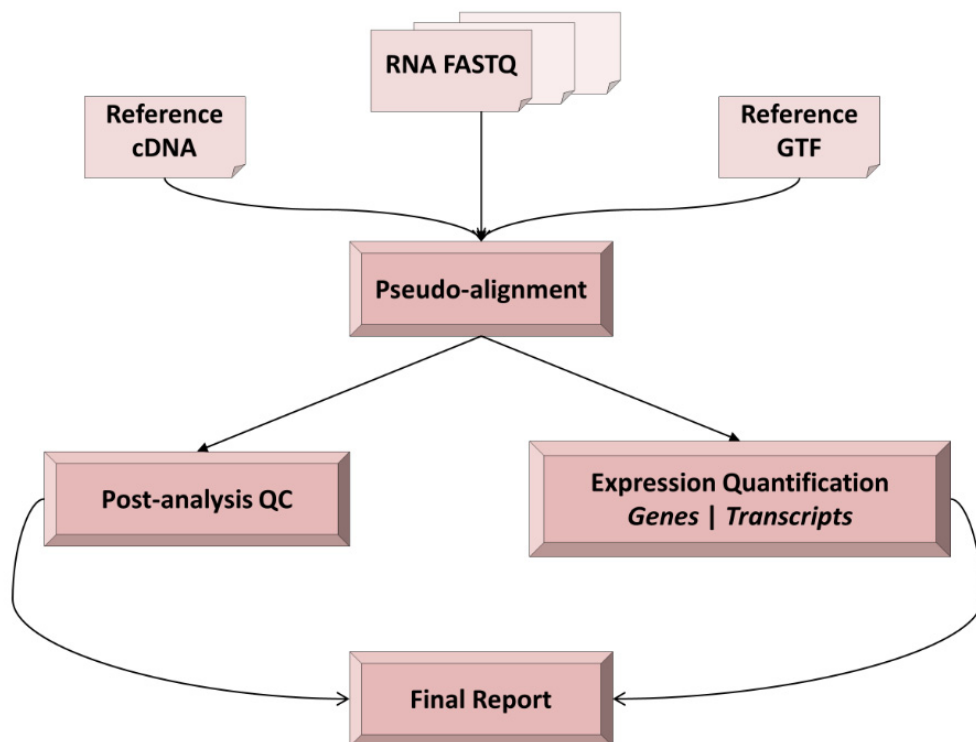

**Supplemental Figure S2:** Workflow of the RNA sequencing results' analyses.

Kallisto: Alignment Scores

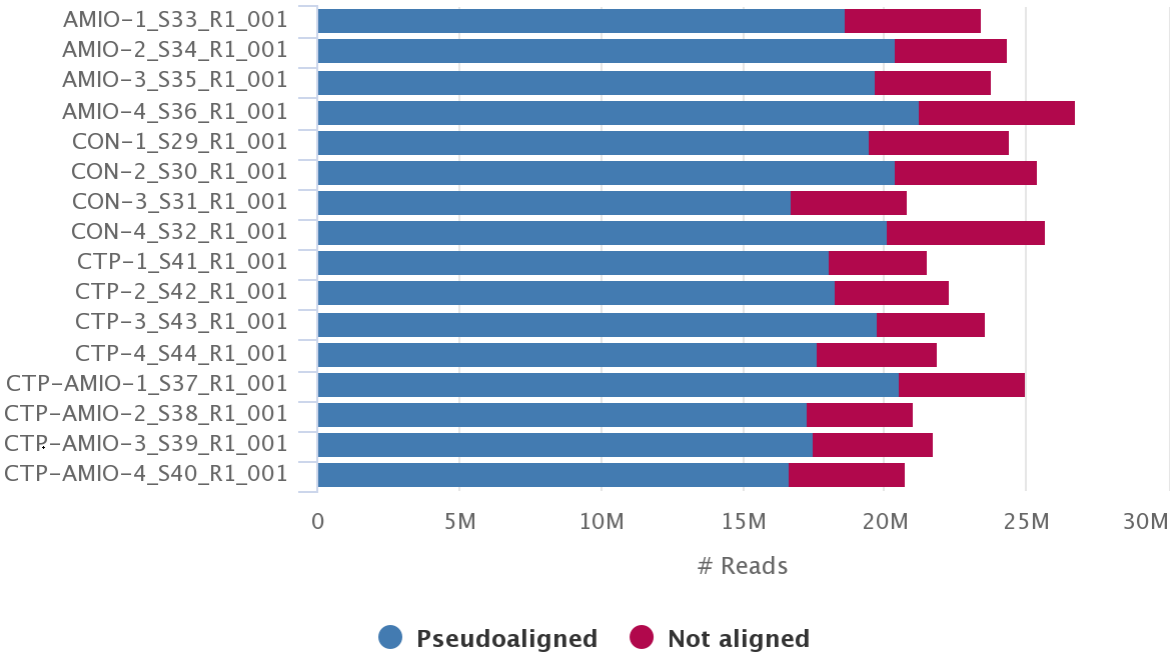

| Sample Name           | Frag Length | % Aligned | M Aligned |
|-----------------------|-------------|-----------|-----------|
| AMIO-1_S33_R1_001     | 161.3bp     | 79.5%     | 18.6      |
| AMIO-2_S34_R1_001     | 159.2bp     | 83.6%     | 20.4      |
| AMIO-3_S35_R1_001     | 164.7bp     | 82.9%     | 19.7      |
| AMIO-4_S36_R1_001     | 157.2bp     | 79.5%     | 21.2      |
| CON-1_S29_R1_001      | 153.7bp     | 79.9%     | 19.5      |
| CON-2_S30_R1_001      | 155.6bp     | 80.3%     | 20.4      |
| CON-3_S31_R1_001      | 168.1bp     | 80.3%     | 16.7      |
| CON-4_S32_R1_001      | 152.0bp     | 78.3%     | 20.1      |
| CTP-1_S41_R1_001      | 153.3bp     | 84.0%     | 18.1      |
| CTP-2_S42_R1_001      | 156.5bp     | 81.8%     | 18.3      |
| CTP-3_S43_R1_001      | 155.2bp     | 83.9%     | 19.8      |
| CTP-4_S44_R1_001      | 161.9bp     | 80.6%     | 17.6      |
| CTP-AMIO-1_S37_R1_001 | 157.4bp     | 82.1%     | 20.5      |
| CTP-AMIO-2_S38_R1_001 | 153.9bp     | 82.1%     | 17.3      |
| CTP-AMIO-3_S39_R1_001 | 163.7bp     | 80.7%     | 17.5      |
| CTP-AMIO-4_S40_R1_001 | 158.0bp     | 80.3%     | 16.7      |

**Supplemental Figure S3:** Kallisto alignment of the samples and the resulting scores for each sample.

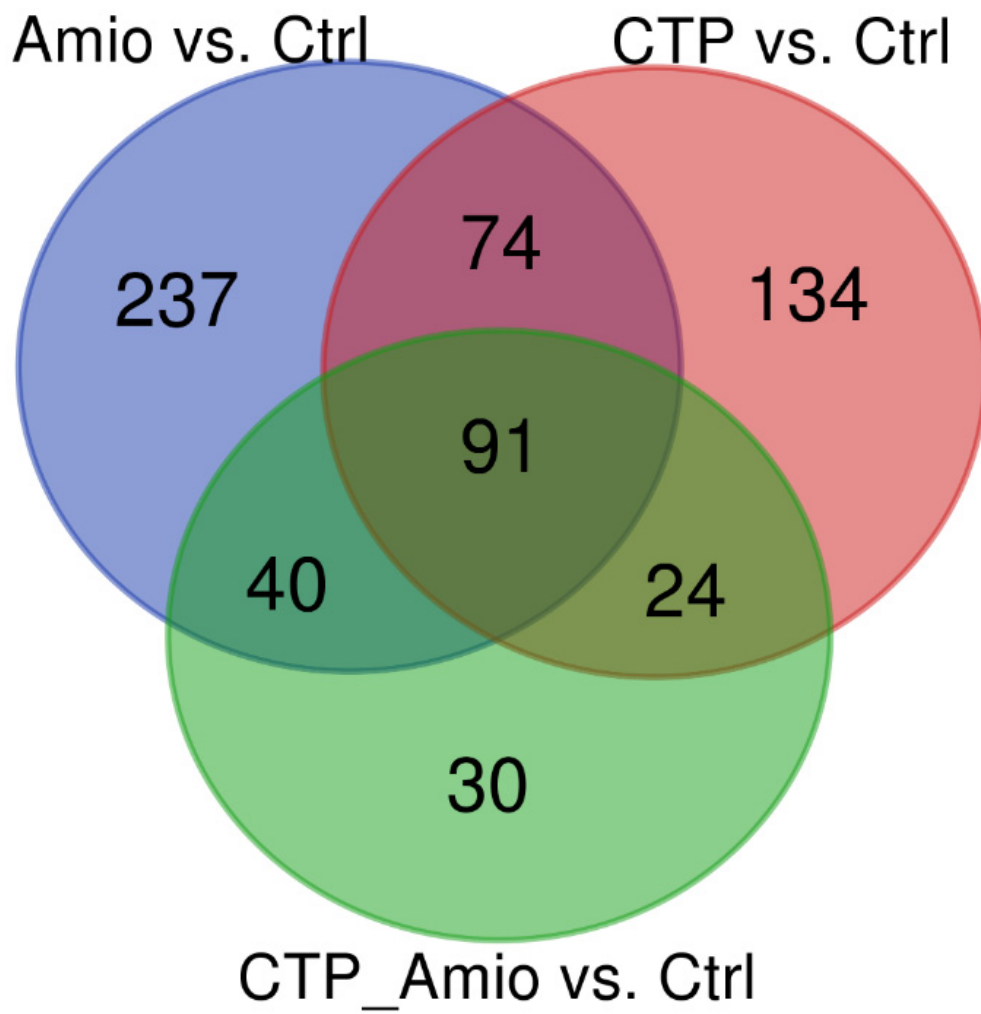

**Supplemental Figure S4:** Common and unique differentially expressed genes between amiodarone, CTP, CTP-amio and the control guinea pig hearts. The Venn diagram shows the overlap between the three differentially expressed gene sets.

Amio vs. Control

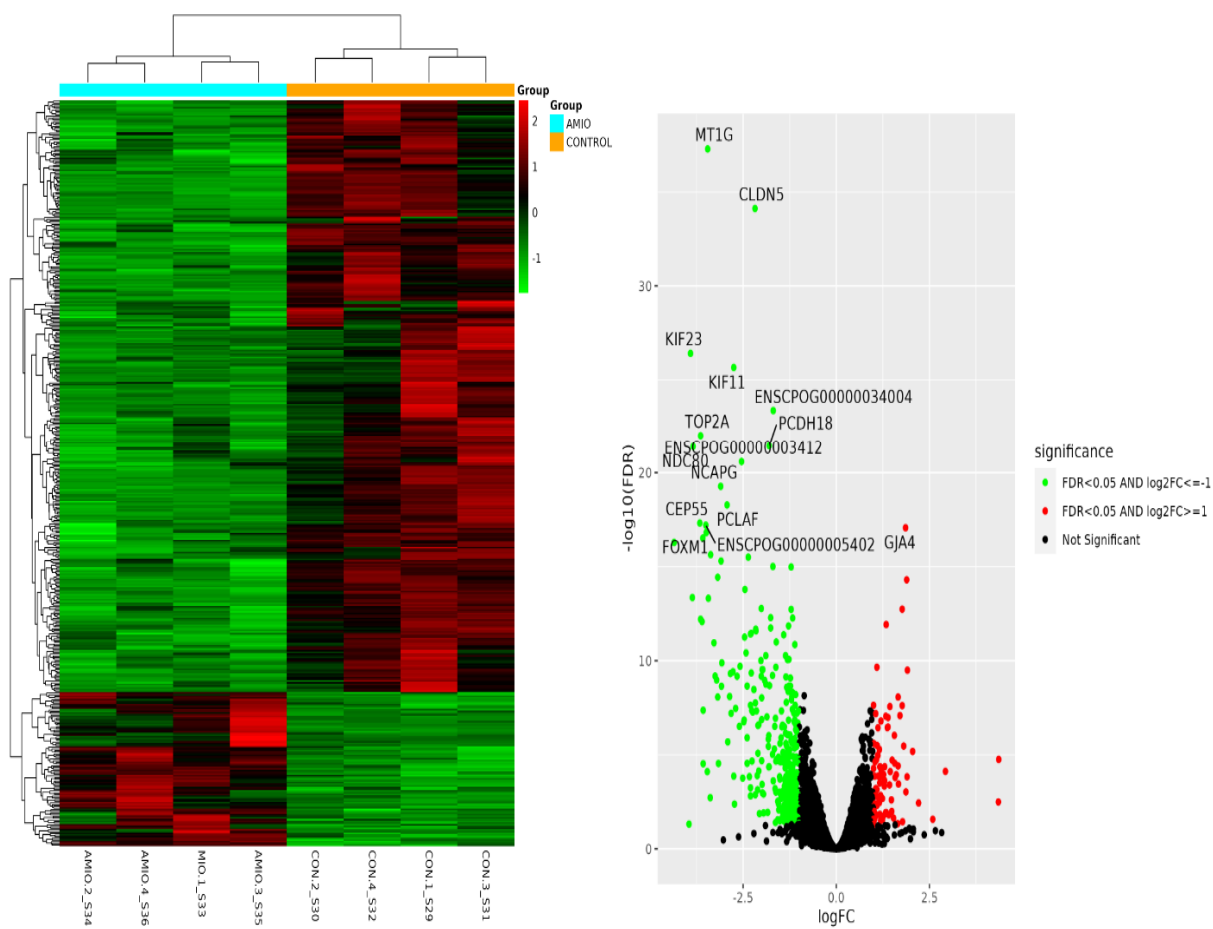

**Supplemental Figure S5:** Heatmap of the differentially expressed genes in guinea pig hearts of amiodarone-treated versus control animals.

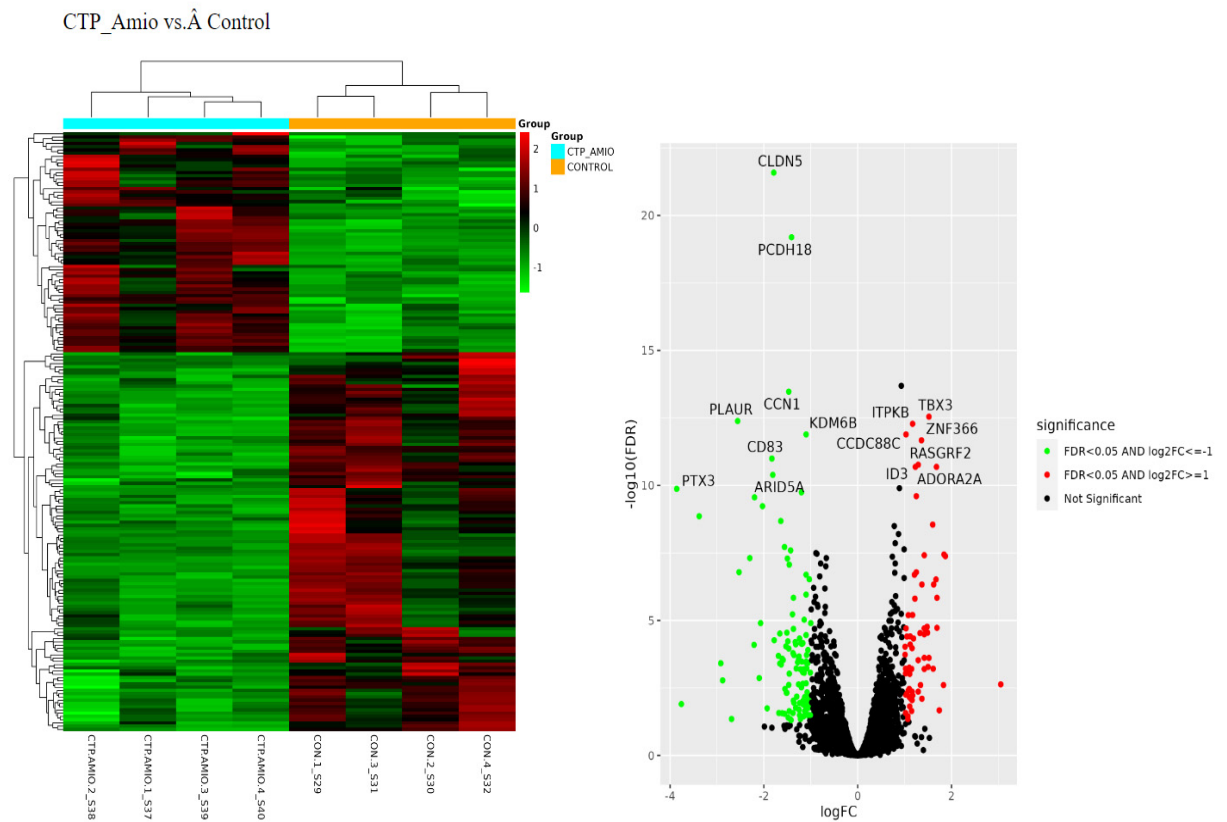

**Supplemental Figure S6:** Heatmap of differentially expressed genes in guinea pig hearts of CTP-amio-treated versus control animals.
